# Supplementary material for: Effects of Microbiota on the Treatment of Obesity with the Natural Product Celastrol in Rats
Source: PubMed Central journal article supplement — Diabetes Metab J. 2020 May 11;44(5):747–63. doi: 10.4093/dmj.2019.0124 (PMC7643605; doi:10.4093/dmj.2019.0124), 2020-05-11
Supplement: dmj-2019-0124-s006.pdf [file dmj-2019-0124-s006.pdf]

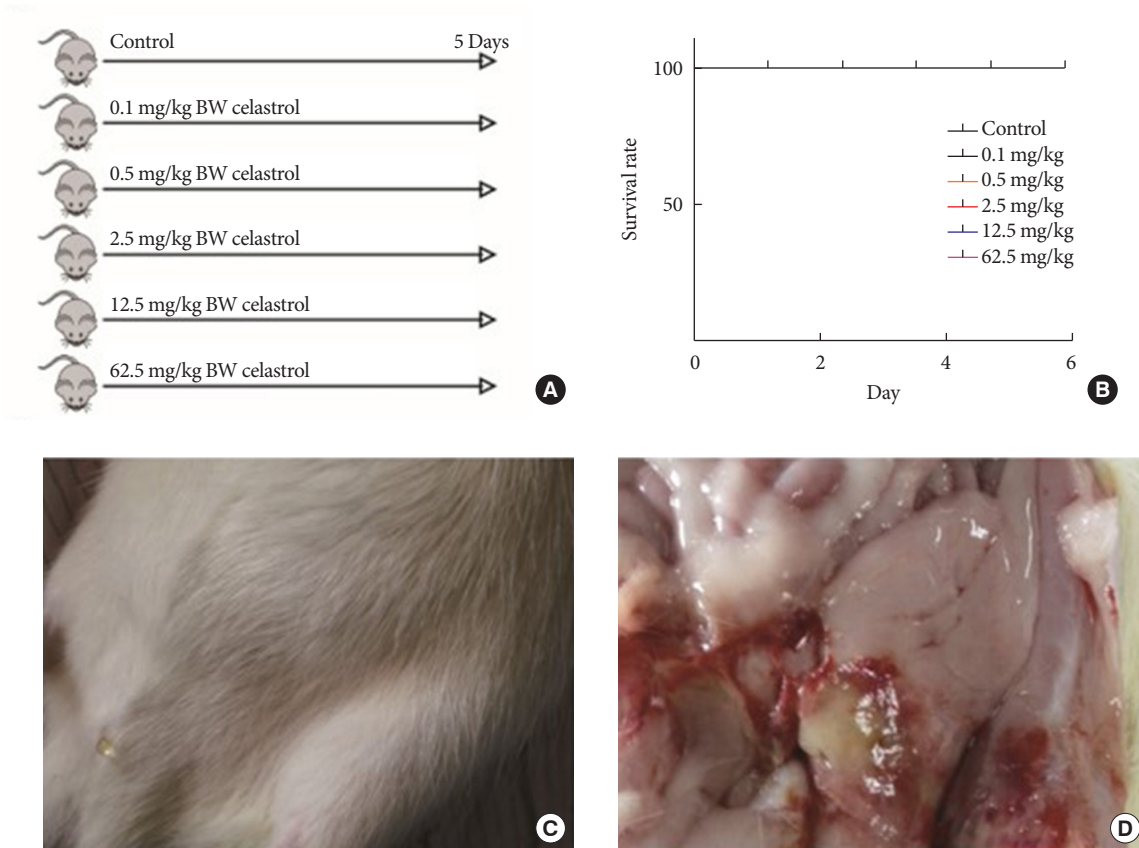

**Supplementary Fig. 5.** Acute lethal toxicity test of celastrol. (A) Schematic of acute lethal toxicity test. (B) Percentage of mice survived after treatment of different dosages of celastrol. (C, D) Adverse reactions of diet-induced obese (DIO) rats after intraperitoneal injection of 500 µg/kg body weight (BW) of celastrol for 1 week.
